# Supplementary material
Source: PubMed Central journal article supplement (PMC4191794)
Supplement: pnas.201407640SI.pdf [file pnas.201407640SI.pdf]

# Supporting Information

Ma et al. 10.1073/pnas.1407640111

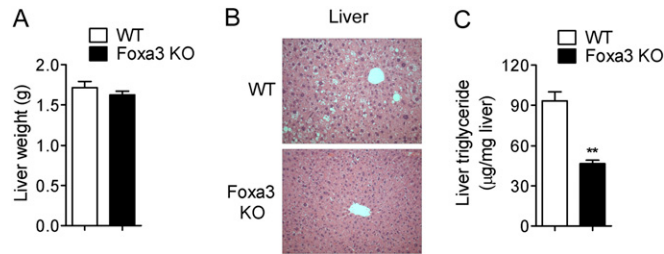

**Fig. S1.** Analysis of liver tissues obtained from 14-mo-old WT and forkhead box protein A3 (Foxa3)-null mice. Liver weights (A), representative images of H&E staining of liver tissues (B), and liver triglyceride levels (C) of 14-mo-old WT and Foxa3-null (Foxa3 KO) mice are shown. Data are presented as mean  $\pm$  SEM. \*\* $P < 0.01$  compared with controls.

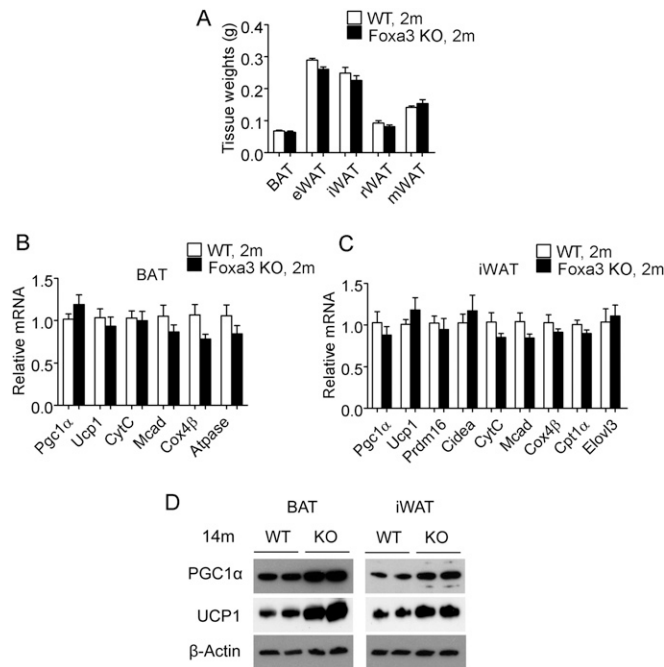

**Fig. S2.** Tissue weights and gene expression levels in 2-mo-old WT and Foxa3-null mice and peroxisome proliferator activated receptor  $\gamma$  coactivator 1  $\alpha$  (PGC1 $\alpha$ ) and uncoupling protein 1 (UCP1) protein levels in 14-mo-old WT and Foxa3-null mice. (A) Fat tissue weight of 2-mo-old WT and Foxa3-null mice (Foxa3 KO). (B and C) Gene expression analysis of BAT (B) and iWAT (C) obtained from 2-mo-old mice ( $n = 6$  per group). (D) Protein levels of PGC1 $\alpha$  and UCP1 in BAT and iWAT obtained from 14-mo-old WT and Foxa3-null mice.  $\beta$ -actin was used for normalization. Data are presented as mean  $\pm$  SEM.





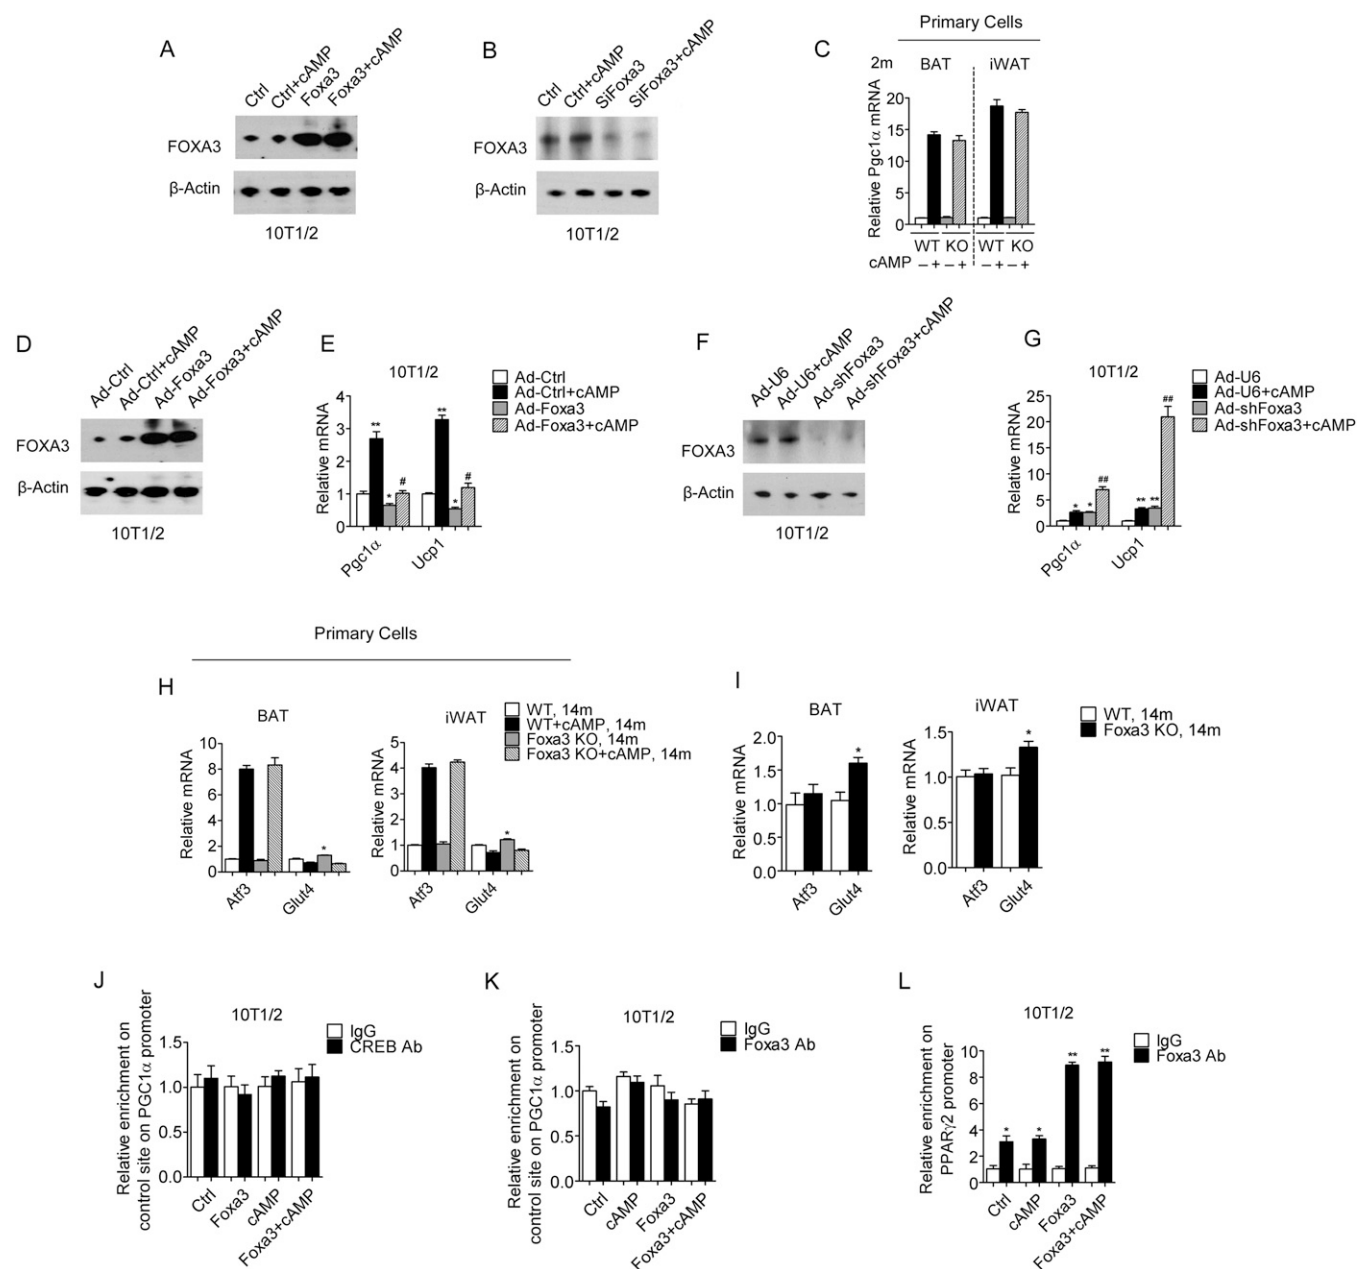

**Fig. S5.** Foxa3 interference with cAMP responsive element binding protein 1 (CREB) downstream pathways is *PGC1α* promoter-selective. (A and B) Foxa3 protein levels in 10T1/2 cells expressing vector (Ctrl), Foxa3 (A), or siFoxa3 (B) in the presence of vehicle or cAMP. (C) Analysis of *PGC1α* mRNA levels in differentiated primary cells obtained from BAT and iWAT of 2-mo-old WT and Foxa3-null (Foxa3 KO) mice treated with vehicle or cAMP. (D and E) Foxa3 protein levels (D) and *PGC1α* and *UCP1* mRNA levels (E) in differentiated 10T1/2 cells infected with control or Foxa3 (Ad-Foxa3) adenoviruses treated with cAMP or vehicle. (F and G) Foxa3 protein levels (F) and *PGC1α* and *UCP1* mRNAs (G) in differentiated 10T1/2 cells infected with control (Ad-U6) or shFoxa3 (Ad-shFoxa3) adenoviruses treated with cAMP or vehicle. (H) mRNA levels of the CREB target gene *ATF3* and of *Glut4* in differentiated primary cells obtained from BAT and iWAT of 14-mo-old WT and Foxa3-null mice treated with vehicle or cAMP. (I) mRNA levels of *ATF3* and *Glut4* in BAT and iWAT of 14-mo-old WT and Foxa3-null mice. (J and K) ChIP analysis of CREB and Foxa3 binding at a control site, adjacent to the Foxa-responsive (J) and CRE-responsive (K) elements, in the *PGC1α* promoter, in untreated or cAMP-treated 10T1/2 cells expressing either vector (Ctrl) or Foxa3. (L) ChIP analysis of Foxa3 binding at the Foxa-responsive element present in the *PPARγ2* promoter in the presence or absence of cAMP in 10T1/2 cells expressing vector (Ctrl) or Foxa3. Data are presented as mean  $\pm$  SEM. \* $P < 0.05$ , \*\* $P < 0.01$  compared with controls. ## $P < 0.01$  compared with controls + cAMP.

**Table S1. Hyperinsulinemic-euglycemic clamp analysis of 14-mo-old WT and Foxa3-null mice**

| Variable                        | WT            | Foxa3 KO                  |
|---------------------------------|---------------|---------------------------|
| Basal plasma glucose, mg/dL     | 149.1 ± 12.4  | 141.1 ± 8.4               |
| Basal insulin, ng/mL            | 3.2 ± 1.1     | 0.4 ± 0.2                 |
| Clamp plasma glucose, mg/dL     | 218.5 ± 4.0   | 201.7 ± 2.7               |
| Clamp insulin, mg/dL            | 7.0 ± 3.0     | 1.6 ± 0.3                 |
| Basal EGP, μmol/kg/min          | 90.9 ± 8.1    | 86.9 ± 4.9                |
| Clamp EGP, μmol/kg/min          | 47.6 ± 9.6    | 13.6 ± 11.2*              |
| Suppression of EGP, %           | 38.2 ± 5.0    | 83.2 ± 13.5 <sup>†</sup>  |
| GIR, μmol/kg/min                | 270.8 ± 9.7   | 326.7 ± 12.6 <sup>‡</sup> |
| Rd, μmol/kg/min                 | 318.4 ± 11.2  | 340.3 ± 11.3              |
| WAT 2-DG uptake, μmol/kg/min    | 7.8 ± 0.9     | 14.0 ± 1.7 <sup>‡</sup>   |
| Muscle 2-DG uptake, μmol/kg/min | 108.9 ± 20.9  | 66.6 ± 9.1                |
| BAT 2-DG uptake, μmol/kg/min    | 717.5 ± 138.8 | 908.3 ± 234.8             |

*n* = 6 for WT and *n* = 4 for Foxa3 KO mice. Data are presented as mean ± SEM. 2-DG, 2-deoxyglucose; EGP, endogenous glucose production; GIR, glucose infusion rate; Rd, glucose disposal rate.

\**P* = 0.053.

<sup>†</sup>*P* < 0.05.

<sup>‡</sup>*P* < 0.01.

**Table S2. Primers used for gene expression analysis**

| Primer   | Forward primer, 5'-3'   | Reverse primer, 5'-3'   |
|----------|-------------------------|-------------------------|
| m36B4    | GCTTCATTGTGGGAGCAGAC    | ATGGTGTTCCTTGCCCATCAG   |
| mPGC1α   | ACCATGACTACTGTCAGTCACTC | GTCACAGGAGGCATCTTTGAAG  |
| mUCP1    | GGCCCTTGTAACAACAAAATAC  | GGCAACAAGAGCTGACAGTAAAT |
| mPRDM16  | CCACCAGCGAGGACTTCAC     | GGAGGACTCTCGTAGCTCGAA   |
| Mcidea   | TGACATTCATGGGATTGCAGAC  | CGAGCTGGATGTATGAGGGG    |
| McytC    | AAATCTCCACGGTCTGTTCGG   | GGGTATCCTCTCCCCAGGTG    |
| MMCAD    | ATGACGGAGCAGCCAATGAT    | TCGTACCCTTCTTCTCTGCTT   |
| mCPT1α   | TTGCCCTACAGCTCTGGCATTTC | GCACCCAGATGATGGGATACTGT |
| mCOX4β   | CTGCCCGGAGTCTGGTAATG    | CAGTCAACGTAGGGGTCATC    |
| mElovl3  | TTCTCACGCGGGTTAAAAATGG  | TCGCAAGTCAATAGGGTTGCAT  |
| mKlhl13  | AGAATTGGTTGCTGCAATACTCC | AAGGCACAGTTTCAAGTGTCTG  |
| mCD40    | TTGTTGACAGCGGTCCATCTA   | CCATCGTGGAGGACTGTTTGT   |
| mEar2    | CCTGTAACCCAGAACTCCA     | CAGATGAGCAAAGGTGCAAA    |
| mTmem26  | ACCCTGTCTATCCACAGAG     | TGTTTGGTGGAGTCTTAAGGTC  |
| mCD137   | CGTGCAGAACTCCTGTGATAAC  | GTCCACCTATGCTGGAGAAGG   |
| mSp100   | TGATGGAGGGAACCCAAACTC   | CTTCCTTGAGAATAGCTGGCAC  |
| mTbx1    | GGCAGGCAGACGAATGTTC     | TTGTCTCTACGGGCACAAAG    |
| mSlc27a1 | CTGGGACTTCCGTGGACCT     | TCCTGCAGACGATACGCAGAA   |
| mAtf3    | AAGACAGAGTGCCTGCAGAA    | GTGCCACCTCTGCTTAGCTC    |
| mGlut4   | AAAAGTGCCTGAAACCAGAG    | TCACCTCCTGCTCTAAAAGG    |

**Table S3. Primers used for ChIP assays**

| Primer                                | Forward primer, 5'-3'   | Reverse primer, 5'-3'  |
|---------------------------------------|-------------------------|------------------------|
| Foxa3-binding site on PGC1α promoter  | CAAAGGCCAAGTGTTCCTT     | TCCTGTGCAAGCTTGCTGC    |
| Control site on PGC1α promoter        | AAGACAGGTGCCTTCAGTTCA   | TGCACATGTCCCAAGCCAT    |
| Foxa3-binding site on PPARγ2 promoter | TCACTTAAACATCAACCATTGGA | GGTCCAAAATGTACTGCTATCC |
